# Supplementary material for: Improvement of Mechanical Properties and Solvent Resistance of Polyurethane Coating by Chemical Grafting of Graphene Oxide
Source: MDPI journal article supplement (doi:10.3390/polym15040882), 2023-02-10
Supplement: s1 [file s1]

Supplementary Material

# Improvement of Mechanical Properties and Solvent Resistance of Polyurethane Coating by Chemical Grafting of Graphene Oxide

Guotao Liang <sup>1,†</sup>, Fengbiao Yao <sup>1,†</sup>, Yanran Qi <sup>1,†</sup>, Ruizhi Gong <sup>1,†</sup>, Rui Li <sup>2</sup>, Baoxuan Liu <sup>3</sup>, Yueying Zhao <sup>4</sup>, Chenglong Lian <sup>1,4,\*</sup>, Luming Li <sup>5,\*</sup>, Xiaoying Dong <sup>1,\*</sup> and Yongfeng Li <sup>1,\*</sup>

- <sup>1</sup> State Forestry and Grassland Administration Key Laboratory of Silviculture in Down-Stream Areas of the Yellow River, College of Forestry, Shandong Agricultural University, Tai'an 271018, China; gtaoliang@163.com (G.L.); fengbiaoyao@163.com (F.Y.); qyran1994@163.com (Y.Q.); ruizhigong789@163.com (R.G.)
- <sup>2</sup> School of Automation, Chongqing University of Posts and Telecommunications, Chongqing 400065, China; lirui@cqupt.edu.cn
- <sup>3</sup> Shandong Laucork Development Co., Ltd., Jining 272100, China; liubaoxuan123@126.com.
- <sup>4</sup> Postdoctoral Innovation Practice Base, Shandong Xiguang Group Co., Ltd., Jining 277600, China; xgsyyf@126.com (Y.Z.)
- <sup>5</sup> College of Chemistry and Materials Engineering, Zhejiang A&F University, Hangzhou 311300, China
- \* Correspondence: lyjj917@sdau.edu.cn (C.L.); llm@zafu.edu.cn (L.L.); dxiaoying1982@163.com (X.D.); lyf288@hotmail.com (Y.L.); Tel.: +86 538 8240610 (Y.L.)
- † These authors contributed equally to this work.

**Citation:** Liang, G.; Yao, F.; Qi, Y.; Gong, R.; Li, R.; Liu, B.; Zhao, Y.; Lian, C.; Li, L.; Dong, X.; Li, Y. Improvement of Mechanical Properties and Solvent Resistance of Polyurethane Coating by Chemical Grafting of Graphene Oxide. *Polymers* **2023**, *15*, 882. <https://doi.org/10.3390/polym15040882>

Academic Editor(s): Sándor Kéki

Received: 25 December 2022

Revised: 19 January 2023

Accepted: 7 February 2023

Published: date

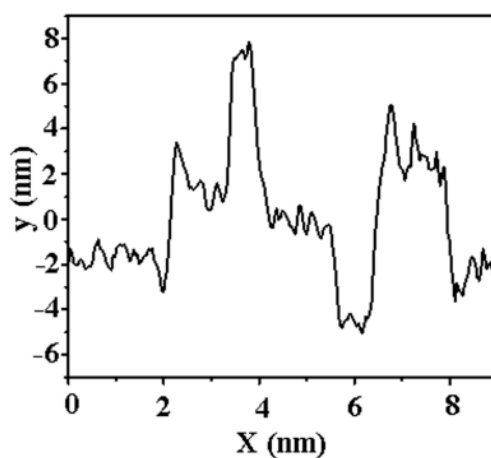

**Figure S1.** AFM cross section of GO.

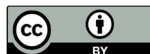

**Copyright:** © 2023 by the authors. Licensee MDPI, Basel, Switzerland. This article is an open access article distributed under the terms and conditions of the Creative Commons Attribution (CC BY) license (<https://creativecommons.org/licenses/by/4.0/>).

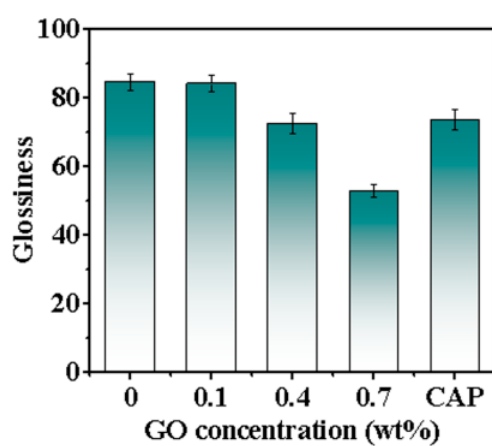

Figure S2. Glossiness of paint films.

Table S1. Other performance tests of paint films.

| Sample     | Surface Dring Times(min) | Hard Dring Times(min) | Pencil Hard-ness | Adhesion |
|------------|--------------------------|-----------------------|------------------|----------|
| WPU        | 29.6                     | 55                    | 2B               | 1        |
| GO-WPU-0.1 | 29.5                     | 55.3                  | B                | 1        |
| GO-WPU-0.4 | 29.9                     | 58.7                  | B                | 1        |
| GO-WPU-0.7 | 30.2                     | 61.6                  | B                | 2        |
| CAP        | 33.9                     | 72.6                  | 2B               | 1        |

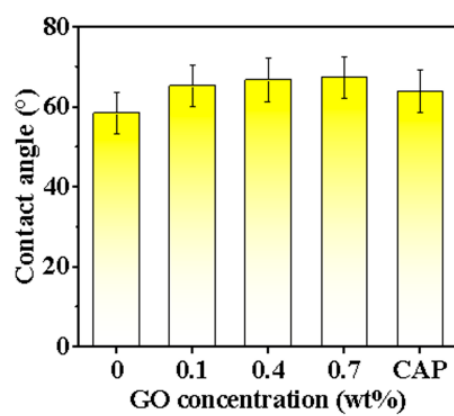

Figure S3. Contact angle of paint films.
